# Supplementary material for: Innovative Non-PrP-Targeted Drug Strategy Designed to Enhance Prion Clearance
Source: PubMed Central journal article supplement (PMC9289883; doi:10.1021/acs.jmedchem.2c00205), 2022-06-30
Supplement: jm2c00205_si_001.pdf [file jm2c00205_si_001.pdf]

# Supporting Information

## An innovative non-PrP-targeted drug strategy designed to enhance prion clearance

Arianna Colini Baldeschi <sup>1, §</sup>, Marco Zattoni <sup>1</sup>, Silvia Vanni <sup>1, †</sup>, Lea Nikolic <sup>1</sup>, Chiara Ferracin <sup>1</sup>, Giuseppina La Sala <sup>2, #</sup>, Maria Summa <sup>3</sup>, Rosalia Bertorelli <sup>3</sup>, Sine Mandrup Bertozzi <sup>4</sup>, Gabriele Giachin <sup>5</sup>, Paolo Carloni <sup>6, 7, 8</sup>, Maria Laura Bolognesi <sup>9</sup>, Marco De Vivo <sup>2</sup> and Giuseppe Legname <sup>1, \*</sup>

### AUTHOR ADDRESS

1 Laboratory of Prion Biology, Department of Neuroscience, Scuola Internazionale Superiore di Studi Avanzati (SISSA), Via Bonomea 265, 34136 Trieste, Italy

2 Molecular Modeling & Drug Discovery Lab, Istituto Italiano di Tecnologia, Via Morego 30, 16163 Genoa, Italy

3 Translational Pharmacology, Istituto Italiano di Tecnologia, Via Morego 30, 16163 Genoa, Italy

4 Analytical Chemistry Lab, Istituto Italiano di Tecnologia, Via Morego 30, 16163 Genoa, Italy

5 Department of Chemical Sciences (DiSC), University of Padua, Via F. Marzolo 1, 35131 Padova, Italy

6 Institute for Advanced Simulations (IAS)-5/Institute for Neuroscience and Medicine (INM)-9, , “Computational Medicine” Forschungszentrum Jülich, 52428 Jülich, Germany

7 Institute for Neuroscience and Medicine (INM)-11, “Molecular Neuroscience and Neuroimaging ” Forschungszentrum Jülich, 52428 Jülich, Germany

8 Department of Physics, RWTH-Aachen University, Aachen, Germany

9 Department of Pharmacy and Biotechnology, University of Bologna, Via Belmeloro 6, 40126 Bologna, Italy

### Corresponding Author

\* Laboratory of Prion Biology, Department of Neuroscience, Scuola Internazionale Superiore di Studi Avanzati (SISSA), via Bonomea 265, 34136 Trieste, Italy. Email: legname@sissa.it

### Present Addresses

§ Institute of Biomedicine, Department of Pathology and Experimental Therapeutics, Bellvitge University Hospital-IDIBELL, Barcelona, Spain.

† Osteoncology and Rare Tumors Center, IRCCS Istituto Romagnolo per lo Studio dei Tumori (IRST) "Dino Amadori", Meldola, Italy.

# Medicinal Chemistry, Research and Early Development, Cardiovascular, Renal and Metabolism (CVRM), BioPharmaceuticals R&D, AstraZeneca, Gothenburg, Sweden.

Table of contents

|                           |     |
|---------------------------|-----|
| Table S1.....             | S3  |
| Figure S1.....            | S7  |
| Figure S2.....            | S8  |
| Figure S3.....            | S9  |
| Figure S4.....            | S10 |
| Figure S5.....            | S11 |
| Figure S6.....            | S12 |
| Figure S7.....            | S13 |
| Figure S8.....            | S14 |
| Figure S9.....            | S15 |
| Figure S10.....           | S16 |
| Figure S11.....           | S17 |
| Figure S12.....           | S18 |
| Purity of compound 5..... | S19 |

| CODE | COMMERCIAL NAME | IUPAC NAME                                                                                      | CAS                                   |
|------|-----------------|-------------------------------------------------------------------------------------------------|---------------------------------------|
| A    | ARN8755_Z_01    | 3-[[[5,5-dioxido-6H-dibenzo[c,e][1,2]thiazin-9-yl)amino]methyl]-7-methyl-2(1H)-Quinolinone      | 1026706-74-0                          |
| B    | ARN5608_Z_01    | 2-(3-Oxo-2,3-dihydro-1H-isoindol-1-yl)-N-[2-(5-p-tolyl-2H-[1,2,4]triazol-3-yl)-ethyl]-acetamide | 1214449-38-3                          |
| C    | ARN2053_Z_01    | 1-(2-Fluoro-phenyl)-3-[1-(5-pyridin-3-yl-2H-[1,2,4]triazol-3-yl)-ethyl]-urea                    | 1000355-25-8                          |
| D    | ARN5896_Z_01    | 3-{{2-(3,5-Dimethyl-pyrazol-1-yl)-ethylamino}-methyl}-5-phenyl-1H-pyridin-2-one                 | 1381725-39-8                          |
| E    | ARN5158_Z_01    | 2-(6-chloro-2-oxo-1,3-benzoxazol-3-yl)-N-[(3-phenyl-1,2,4-oxadiazol-5-yl)methyl]acetamide       | 1214533-39-7                          |
| F    | ARN2996_J_01    | (3,5-Dimethyl-1H-indol-2-ylmethyl)-methyl-(1-methyl-2-pyridin-2-yl-ethyl)-amine                 | 1287460-72-3<br>(cas of neutral form) |
| G    | ARN2356_Z_01    | [5-Amino-1-(4-fluoro-phenyl)-1H-pyrazol-4-yl]-<br>(1H-pyrrol-2-yl)-methanone                    | 1381295-34-6                          |

|   |               |                                                                                                     |                                       |
|---|---------------|-----------------------------------------------------------------------------------------------------|---------------------------------------|
| H | ARN2357_Z_01  | [5-Amino-1-(2,4-difluoro-phenyl)-1H-pyrazol-4-yl]-(1H-pyrrol-2-yl)-methanone                        | 1381407-09-5                          |
| I | ARN10184_A_01 | 5-[2-(3-Chloro-phenyl)-ethyl]-3-[[piperidin-4-ylmethyl]-amino]-methyl-pyrazolo[1,5-a]pyrimidin-7-ol | 2058940-45-5<br>(cas of neutral form) |
| L | ARN1510_Z_01  | 4'-Fluoro-biphenyl-3-carboxylic acid (1H-imidazol-2-ylmethyl)-amide                                 | 1381337-70-7                          |
| M | ARN5864_Z_01  | 1-(5-Pyridin-3-yl-2H-[1,2,4]triazol-3-ylmethyl)-3-(2-trifluoromethyl-phenyl)-urea                   | 1000354-89-1                          |
| N | ARN8628_Z_01  | 5-Isopropyl-2H-pyrazole-3-carboxylic acid [2-(5-pyridin-3-yl-2H-[1,2,4]triazol-3-yl)-ethyl]-amide   | 1029834-71-6                          |
| O | ARN5863_Z_01  | 1-(3-Methoxy-phenyl)-3-(5-pyridin-3-yl-2H-[1,2,4]triazol-3-ylmethyl)-urea                           | 1000353-70-7                          |
| P | ARN11880_Z_01 | 3-(5-Chloro-1-methyl-1H-benzimidazol-2-yl)-N-(3-[1,2,4]triazol-1-ylmethyl-phenyl)-propionamide      | 1214586-09-0                          |
| Q | ARN1609_Z_01  | (5-Fluoro-1H-indol-2-yl)-(3-imidazo[4,5-b]pyridin-3-yl-pyrrolidin-1-yl)-methanone                   | 1381040-70-5<br>(racemate)            |
| R | ARN9565_Z_01  | 1-[1-(4-Fluoro-phenyl)-1H-pyrazol-4-ylmethyl]-4-thiazol-2-yl-piperazine                             | 1214413-13-4                          |



|   |               |                                                                                                         |              |
|---|---------------|---------------------------------------------------------------------------------------------------------|--------------|
| S | ARN10145_Z_01 | Benzyl-(7-methoxy-2H-chromen-3-ylmethyl)<br>-(6-methyl-pyridin-2-ylmethyl)-amine                        | 1214435-09-2 |
| T | ARN11752_Z_01 | 1-Pyrimidin-2-yl-piperidine-4-carboxylic acid<br>(1-methyl-1H-imidazol-2-ylmethyl)-amide                | 2059666-43-0 |
| U | ARN8304_Z_01  | 2-(3,5-Dimethyl-pyrazol-1-yl)-N-<br>[2-(5-pyridin-3-yl-2H-[1,2,4]triazol-3-yl)-<br>ethyl]-acetamide     | 958609-69-3  |
| 1 | ARN11457_Z_01 | [4-(5-Amino-1-p-tolyl-1H-pyrazole-4-<br>carbonyl)-piperidin-1-yl]-<br>(4-methyl-thiazol-5-yl)-methanone | 1381325-24-1 |
| 2 | ARN11512_Z_01 | (5-Amino-1-p-tolyl-1H-pyrazol-4-yl)-<br>(1-cyclobutanecarbonyl-pyrrolidin-3-yl)-<br>methanone           | 1381388-32-4 |
| 3 | ARN12643_Z_01 | (5-Amino-1-phenyl-1H-pyrazol-4-yl)<br>-(1H-indol-3-yl)-methanone                                        | 1015939-70-4 |
| 4 | ARN12924_Z_01 | [4-(5-Amino-1-phenyl-1H-pyrazole-4-<br>carbonyl)<br>-piperidin-1-yl]-isoxazol-5-yl-methanone            | 1381478-56-3 |
| 5 | ARN1468_Z_01  | [5-Amino-1-(4-trifluoromethoxy-phenyl)-<br>1H-pyrazol-4-yl]-piperidin-4-yl-methanone                    | 1381459-14-8 |
| 6 | ARN1585_Z_01  | 1-{4-[5-Amino-1-(3-fluoro-phenyl)-<br>1H-pyrazole-4-carbonyl]-piperidin-1-yl}-<br>ethanone              | 1381429-03-3 |

|   |              |                                                                                               |              |
|---|--------------|-----------------------------------------------------------------------------------------------|--------------|
| 7 | ARN2275_Z_01 | 1-(4-Fluoro-phenyl)-1H<br>-pyrazole-4-carboxylic acid (tetrahydro-<br>pyran-3-yl)-amide       | 958625-69-9  |
| 8 | ARN3623_Z_01 | N-[(3,5-dimethyl-1H-pyrazol-4-yl)methyl]-<br>1-(4-fluorophenyl)-1H-Pyrazole-4-<br>carboxamide | 1287426-60-1 |

**Table S1. Compounds.** The table lists code, commercial name, IUPAC name, and CAS number of each compound used in the present study

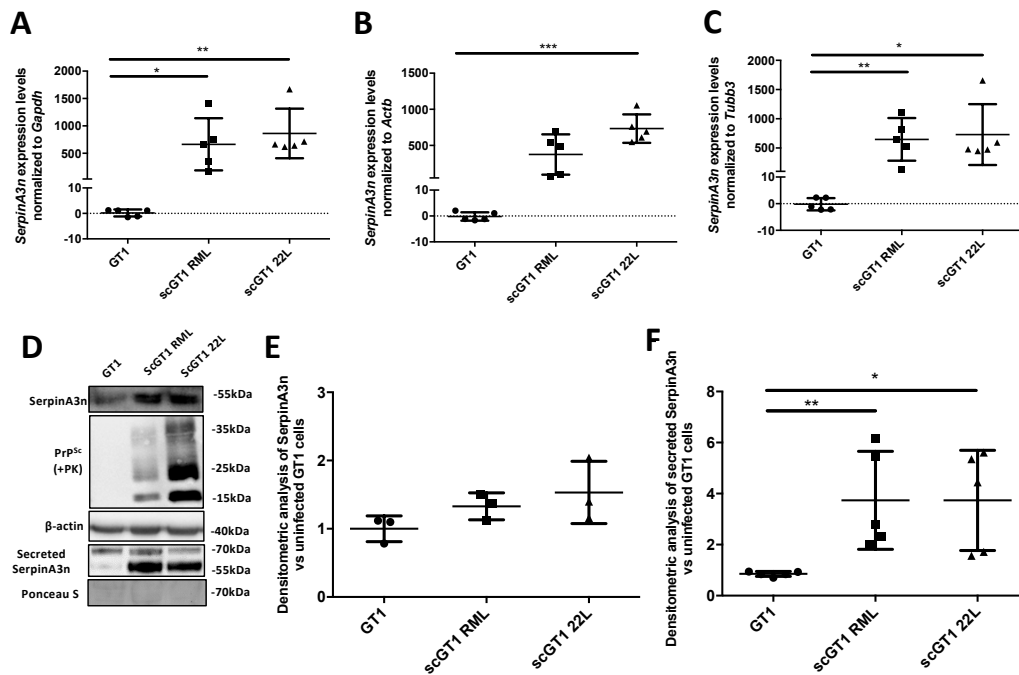

**Figure S1. SerpinA3n expression in uninfected and prion-infected GT1 cell lines.** A, B, C Gene expression analysis of SerpinA3n in RML- (n=5) and 22L-infected GT1 cell lines (n=5) compared to uninfected cells (n=5), normalized on *Gapdh* (A), *Actb* (B) and *Tubb3* (C) as reference genes. The relative expression ratio (fold change, FC) was calculated using the  $2^{-\Delta\Delta C_T}$  method.  $\Delta C_T$  was calculated by subtracting the  $C_T$  of the reference genes (*Gapdh*, *Actb*, *Tubb3*) from the  $C_T$  of the target one (*SerpinA3n*).  $\Delta\Delta C_T$  values were obtained with the  $\Delta C_T$  of each sample from the infected cell group (either with RML or 22L), minus the mean  $\Delta C_T$  of the population of calibrator samples (uninfected cells). **D** Representative WB image of intracellular and secreted SerpinA3n on uninfected and RML- and 22L-infected GT1. Ponceau staining of the membrane for secreted SerpinA3n was used as a protein loading control. SerpinA3n and  $\beta$ -actin were developed on the same membrane, sequentially. PrP<sup>Sc</sup> signal was developed on another membrane after PK-digestion of cell lysates. WB image has been cropped to improve the clarity of the signal. Molecular weight was represented on the right (kDa). **E** Densitometric analysis of intracellular SerpinA3n levels normalized on  $\beta$ -actin WB signal between uninfected (n=3) and RML- (n=3) and 22L-infected GT1 cell lines (n=3). **F** Densitometric analysis of secreted SerpinA3n levels WB signal between uninfected (n=5) and RML- (n=5) and 22L-infected GT1 cell lines (n=5). Statistical significance was performed using the Kruskal-Wallis test with Dunn's multiple comparisons compared to uninfected cells. \*p<0.05, \*\* p<0.01.

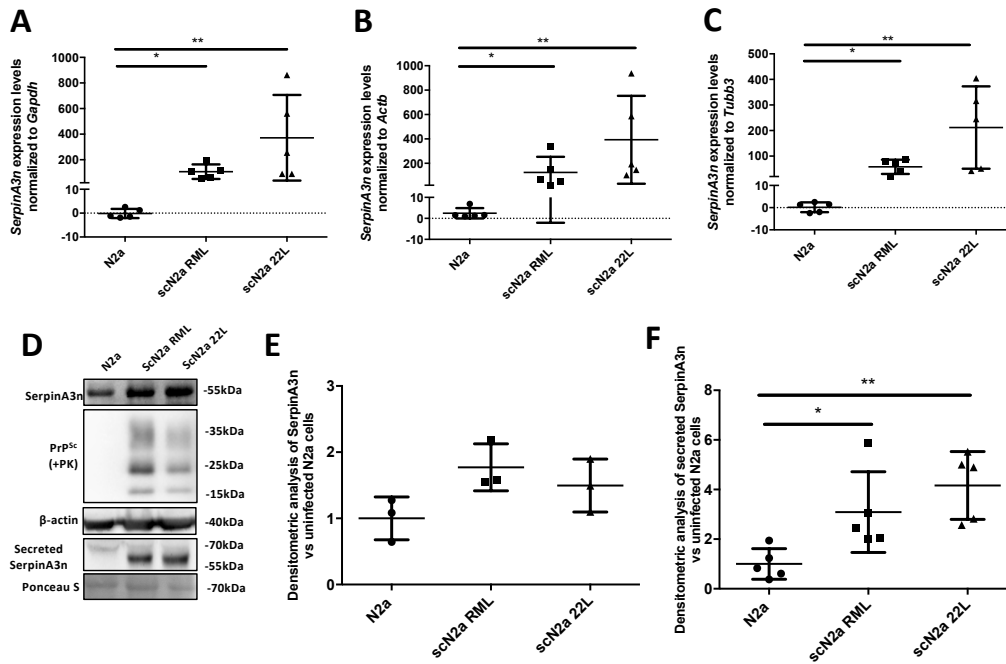

**Figure S2. SerpinA3n expression in uninfected and prion-infected N2a cell lines.** A, B, C. Gene expression analysis of SerpinA3n in RML- (n=5) and 22L-infected N2a cell lines (n=5) compared to uninfected cells (n=5), normalized on *Gapdh* (A), *Actb* (B) and *Tubb3* (C) as reference genes. The relative expression ratio (fold change, FC) was calculated using the  $2^{-\Delta\Delta C_T}$  method.  $\Delta C_T$  was calculated by subtracting the  $C_T$  of the reference genes (*Gapdh*, *Actb*, *Tubb3*) from the  $C_T$  of the target one (*SerpinA3n*).  $\Delta\Delta C_T$  values were obtained with the  $\Delta C_T$  of each sample from the infected cell group (either with RML or 22L), minus the mean  $\Delta C_T$  of the population of calibrator samples (uninfected cells). **D** Representative WB image of intracellular and secreted SerpinA3n on uninfected and RML- and 22L-infected N2a. Ponceau staining of the membrane for secreted SerpinA3n was used as a protein loading control. SerpinA3n and  $\beta$ -actin were developed on the same membrane, sequentially. PrP<sup>Sc</sup> signal was developed on another membrane after PK-digestion of cell lysates. WB image has been cropped to improve the clarity of the signal. Molecular weight was represented on the right (kDa). **E** Densitometric analysis of intracellular SerpinA3n levels normalized on  $\beta$ -actin WB signal between uninfected (n=3) and RML- (n=3) and 22L-infected N2a cell lines (n=3). **F** Densitometric analysis of secreted SerpinA3n levels WB signal between uninfected (n=5) and RML- (n=5) and 22L-infected N2a cell lines (n=5). Statistical significance was performed using the Kruskal-Wallis test with Dunn's multiple comparisons compared to uninfected cells. \*p<0.05, \*\* p<0.01.

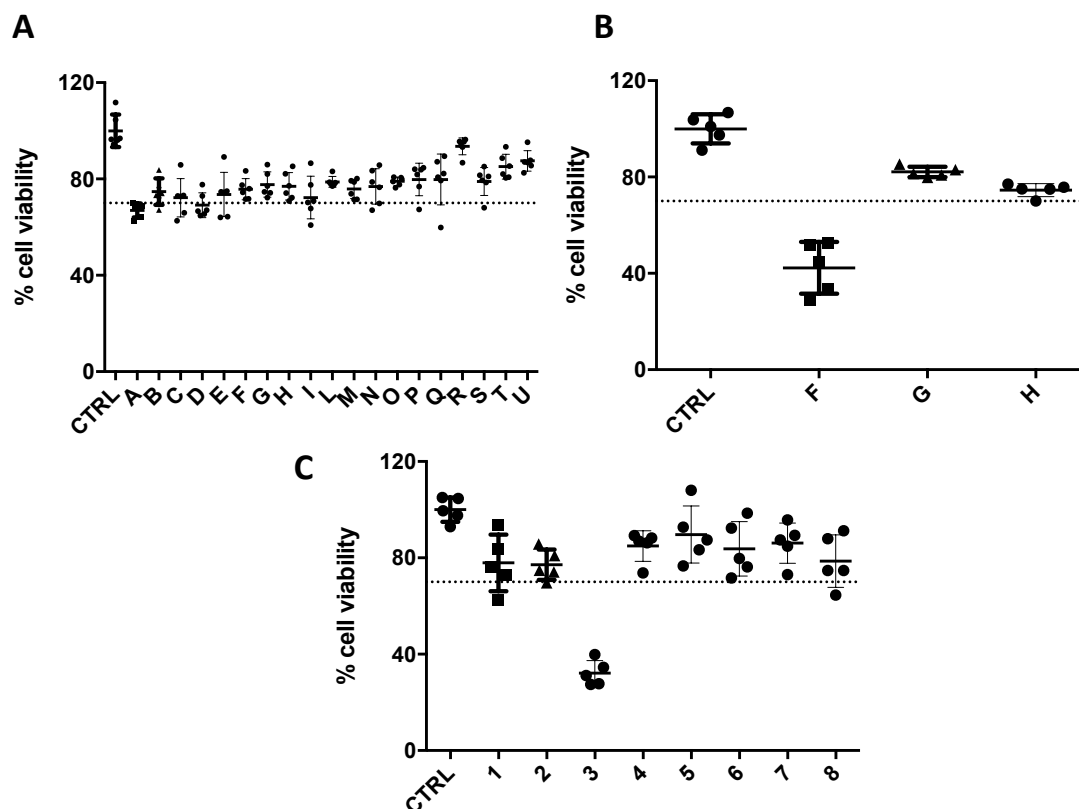

**Figure S3. Cell viability assay of tested molecules.** **A** MTT analysis of ScGT1 RML treated with the vehicle (CTRL) or the drugs (compounds A-U) at 20µM. **B** MTT analysis of ScGT1 RML treated with the vehicle (CTRL) or the drug (F, G, and H) at 40µM. **C** MTT analysis of ScGT1 RML treated with the vehicle (CTRL) or the drug (compounds 1-8) at 20µM. The experiment has been performed in six technical replicates.

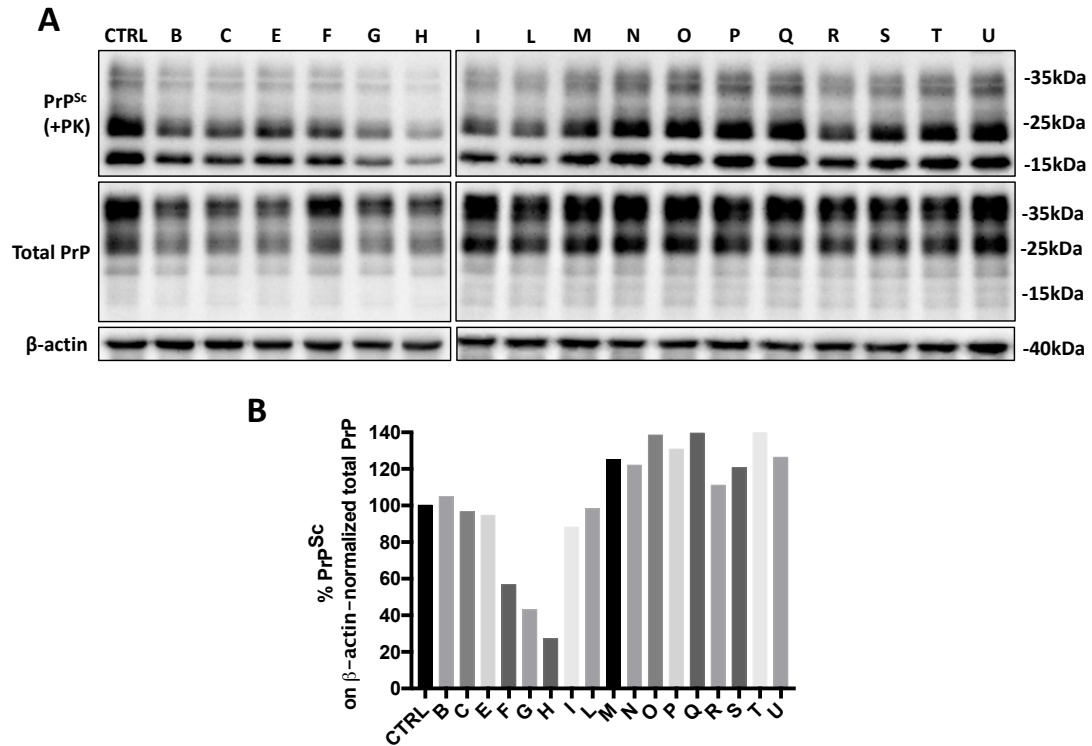

**Figure S4. Anti-prion effect of first library molecules.** **A** Western blotting of PrP<sup>Sc</sup>, Total PrP and β-actin in lysates from ScGT1 RML treated with vehicle (CTRL) or drug (compounds A-U) at 20μM. Molecular weight is represented on the right (kDa). **B** densitometric analysis of normalized PrP<sup>Sc</sup> levels in ScGT1 RML treated with the vehicle or the drug.

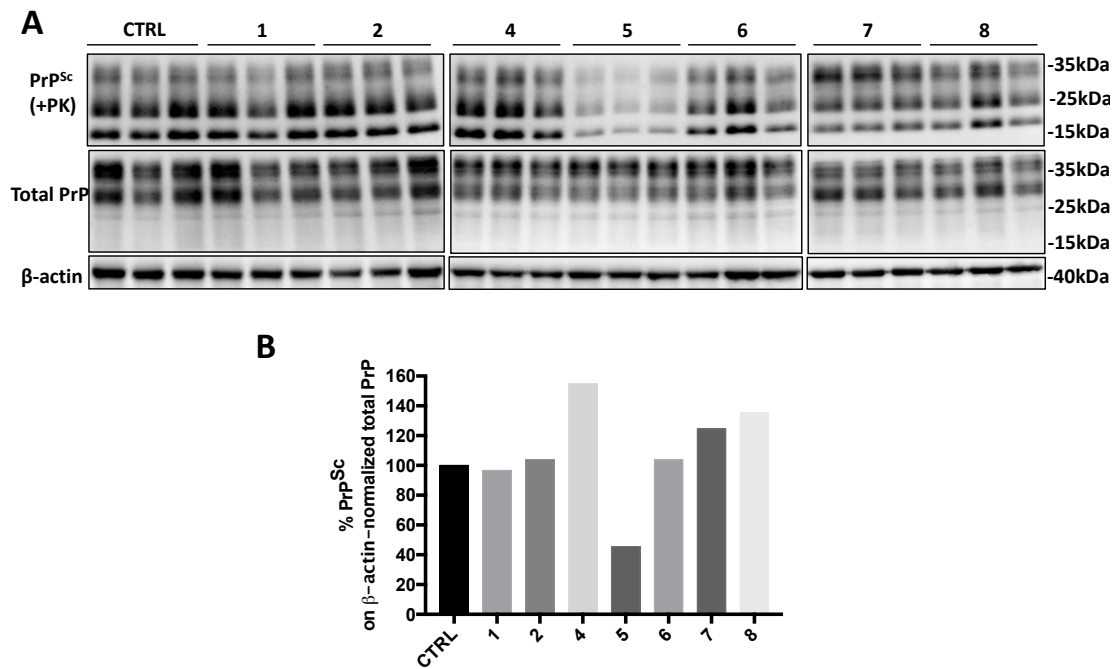

**Figure S5. Anti-prion effect of second library molecules.** **A** Western blotting of PrP<sup>Sc</sup>, Total PrP and β-actin in lysates from ScGT1 RML treated with vehicle (CTRL) or drug (compounds 1-8) at 20μM. The experiment has been performed in triples. Molecular weight is represented on the right (kDa). **B** Densitometric analysis of normalized PrP<sup>Sc</sup> levels in ScGT1 RML treated with the vehicle or the drug.





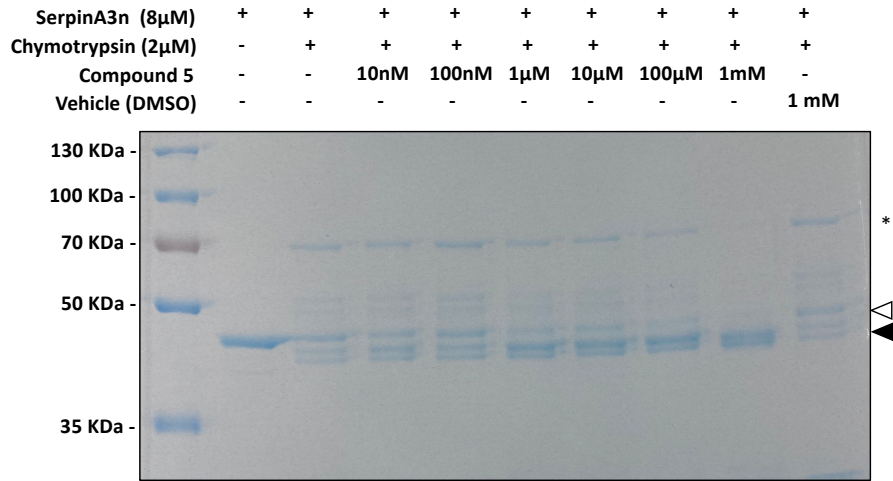

**Figure S7. Compound 5 inhibitory activity on SerpinA3n-chymotrypsin complex formation.** SDS-PAGE Coomassie blue staining of increasing concentrations (10nM to 1mM) compound 5 or vehicle (DMSO) incubated with SerpinA3n (8μM) and chymotrypsin (2μM), showing SDS-stable SerpinA3n-chymotrypsin complexes (asterisk), active SerpinA3n (white arrowhead), and cleaved SerpinA3n (black arrowhead).

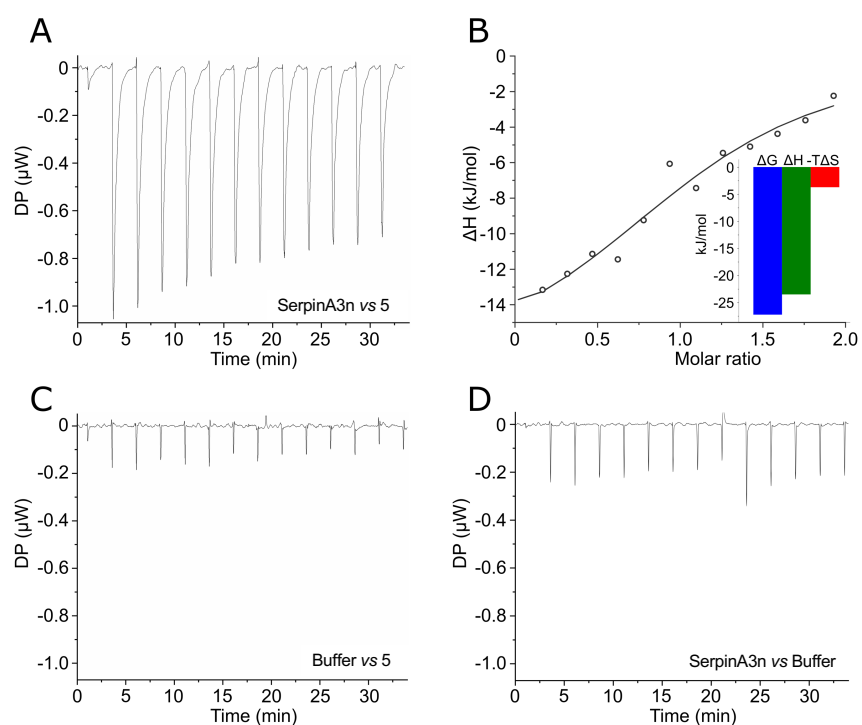

**Figure S8. ITC measurements.** **A** A representative raw titration data obtained from the titration of 16  $\mu\text{M}$  SerpinA3n with 160  $\mu\text{M}$  compound 5. **B** Wiseman plot of integrated data (black circles) and fitted isothermal binding curve. From two independent experiments, an apparent mean  $K_D$  of 26  $\mu\text{M}$  for the single macroscopic dissociation constant was obtained, with a 1:1 stoichiometry. In the inset, the signature shows a mean  $\Delta G$ ,  $\Delta H$  and  $-\Delta S$  of approximately -27.3, -23.5 and -3.73 kJ/mol, respectively. **C**, **D** Representative raw titration data obtained from the titration of 160  $\mu\text{M}$  compound 5 (**C**), and 16  $\mu\text{M}$  SerpinA3n (**D**) with buffer, as controls.

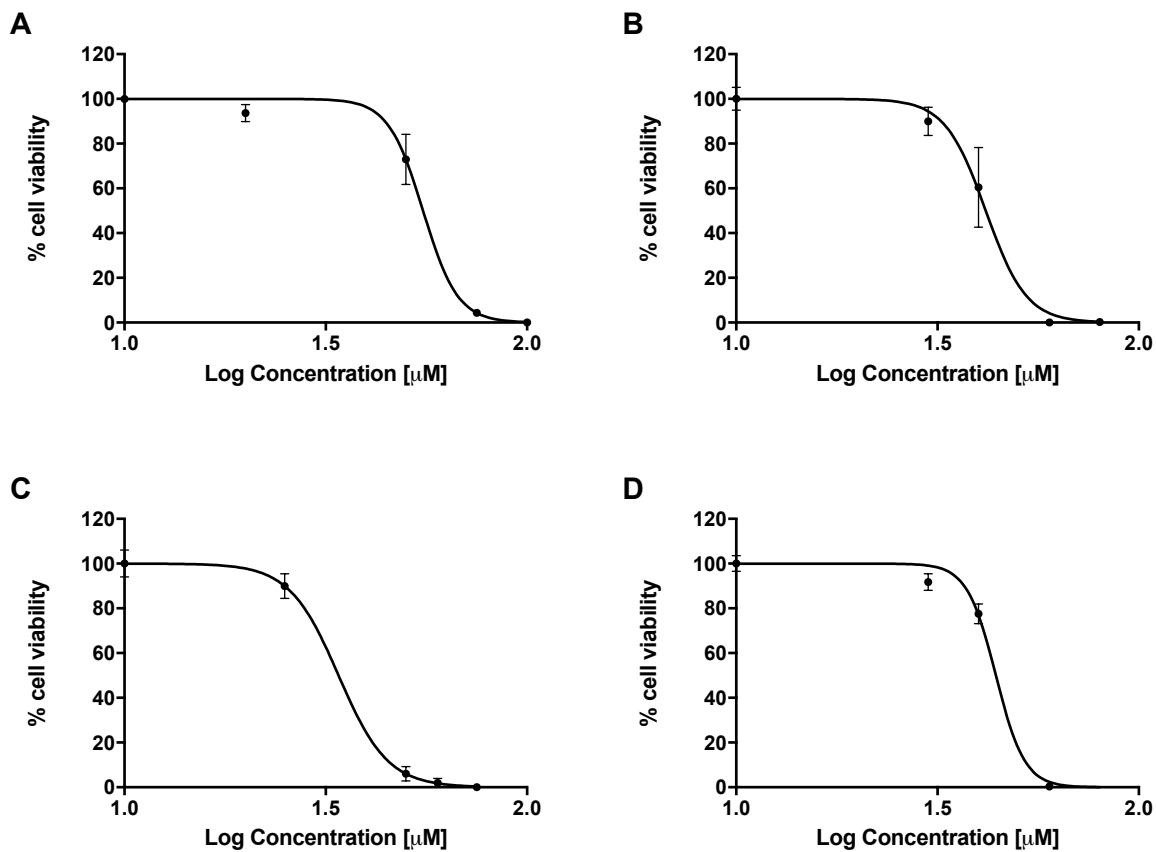

**Figure S9.** Dose-survival curve of compound 5 on RML- and 22L-infected GT1 and N2a cell lines. MTT analysis after 6 days treatment with increasing concentration of compound 5 in ScGT1 RML (A, LD<sub>50</sub>=55.17), ScGT1 22L (B, LD<sub>50</sub>=41.68) ScN2a RML (C, LD<sub>50</sub>=44.17) and ScN2a 22L (D, LD<sub>50</sub>=34.03) (n=3).

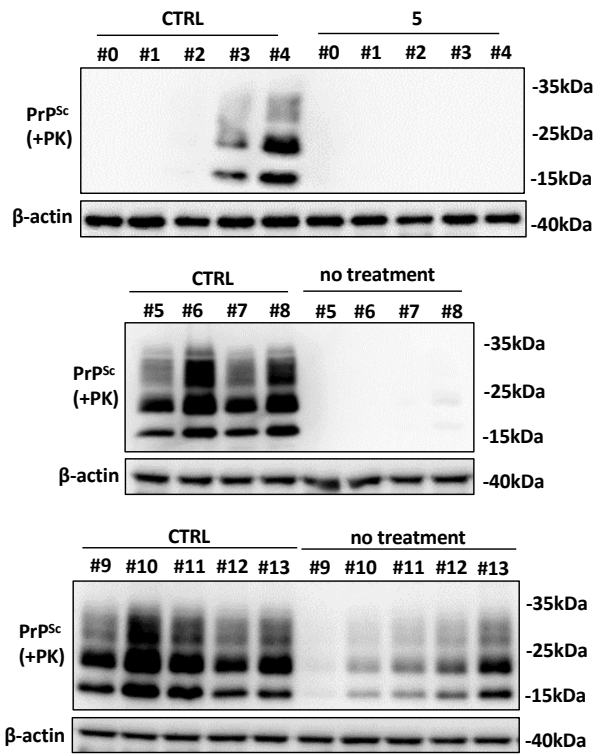

**Figure S10. *De novo* infection with compound 5.** Western blotting analysis of PrP<sup>Sc</sup> in lysates from *de novo* infected GT1 cell line treated with vehicle (CTRL) or the drug (compound 5) for several passages at 20μM. β-actin has been performed as a loading control. Molecular weight is represented on the right (kDa).

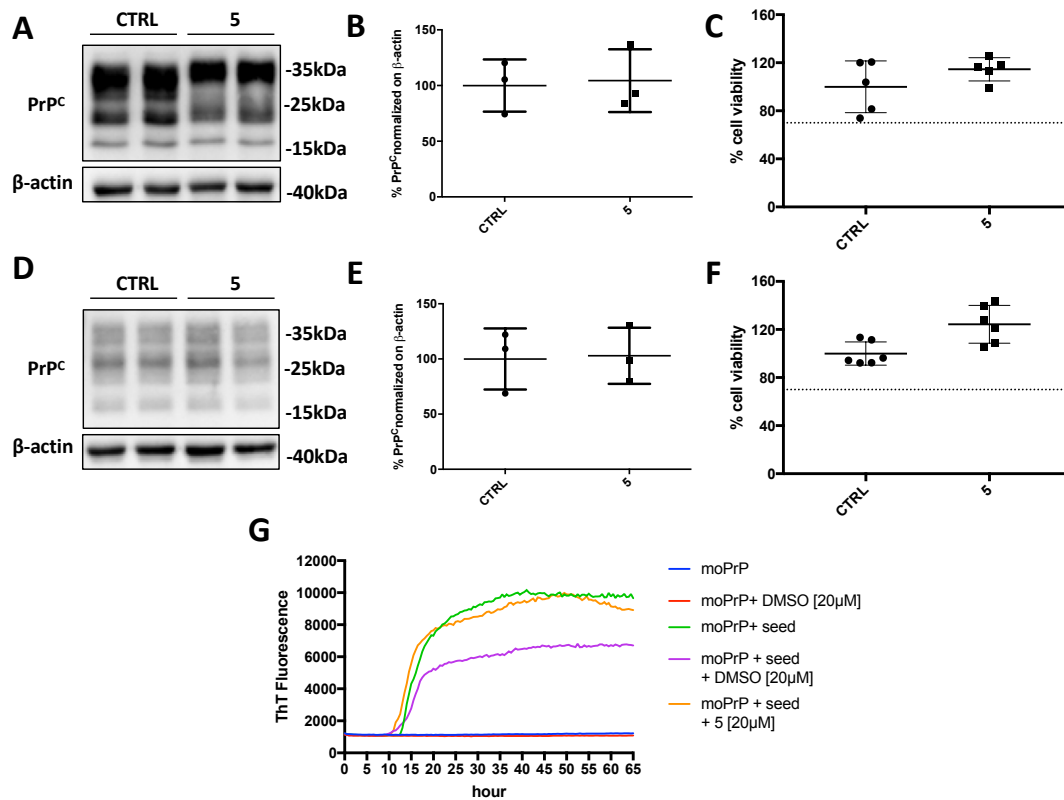

**Figure S11. Cell viability assay and PrP<sup>C</sup> amount in compound 5-treated not-infected cells and PrP<sup>C</sup> aggregation propensity in presence of compound 5.** A, D Representative Western Blot image of PrP<sup>C</sup> and β-actin in lysates from GT1 (A) N2a (D) treated with vehicle (CTRL) or compound 5 at 20μM. Molecular weight is represented on the right (kDa). B, E Densitometric analysis of normalized PrP<sup>C</sup> levels GT1 (B) and N2a cells (E) treated with the vehicle (CTRL) or compound 5. Experiments have been performed in duplicates (n=3). C, F MTT analysis of GT1 (C) and N2a (F) treated with the vehicle (CTRL) or compound 5 at 20μM. The experiment has been performed in six technical replicates. G RT-QuIC analysis of PrP-compound 5 interaction. The presence of “seed” (PrP<sup>Sc</sup>) is responsible for an increased formation of ThT fluorescent PrP aggregates in presence (green line) or absence of compound 5 (orange line). Incubation of recombinant mouse PrP (moPrP) alone (blue line) or in presence of DMSO (red line) has been performed as negative control. A positive control is represented by moPrP in presence of DMSO to which “seed” has been added (purple line).

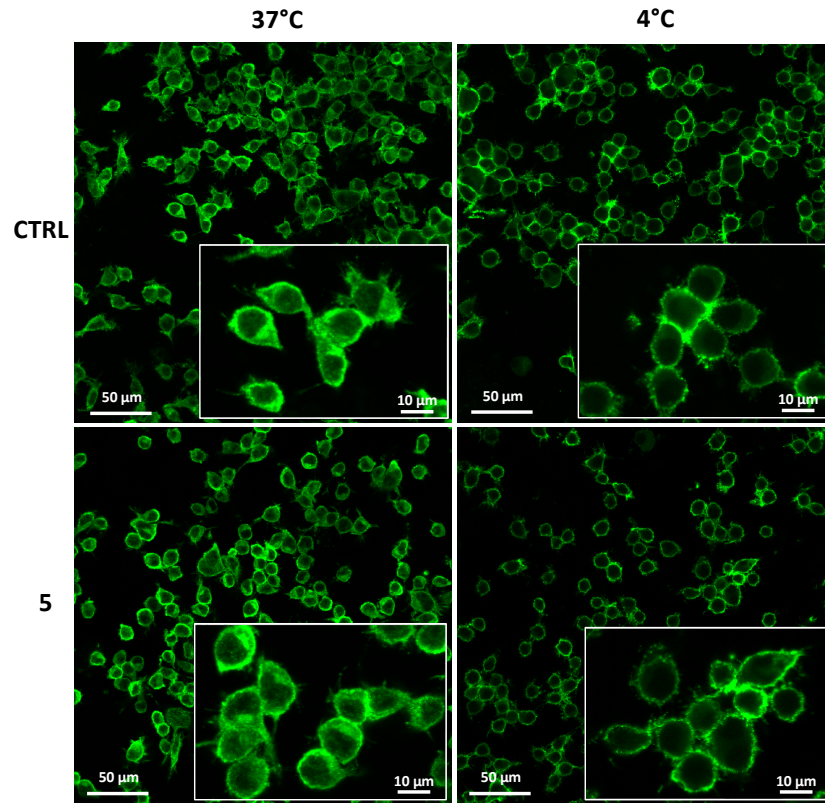

**Figure S12. PrP<sup>C</sup> localization upon compound 5 treatment.** Immunofluorescence staining of PrP<sup>C</sup> (experiment performed at 37°C) and membrane only PrP<sup>C</sup> (experiment performed at 4°C, to block PrP recycling) in N2a cells treated with compound 5 compared to control cells (treated with vehicle only, DMSO).

### Purity of compound 5

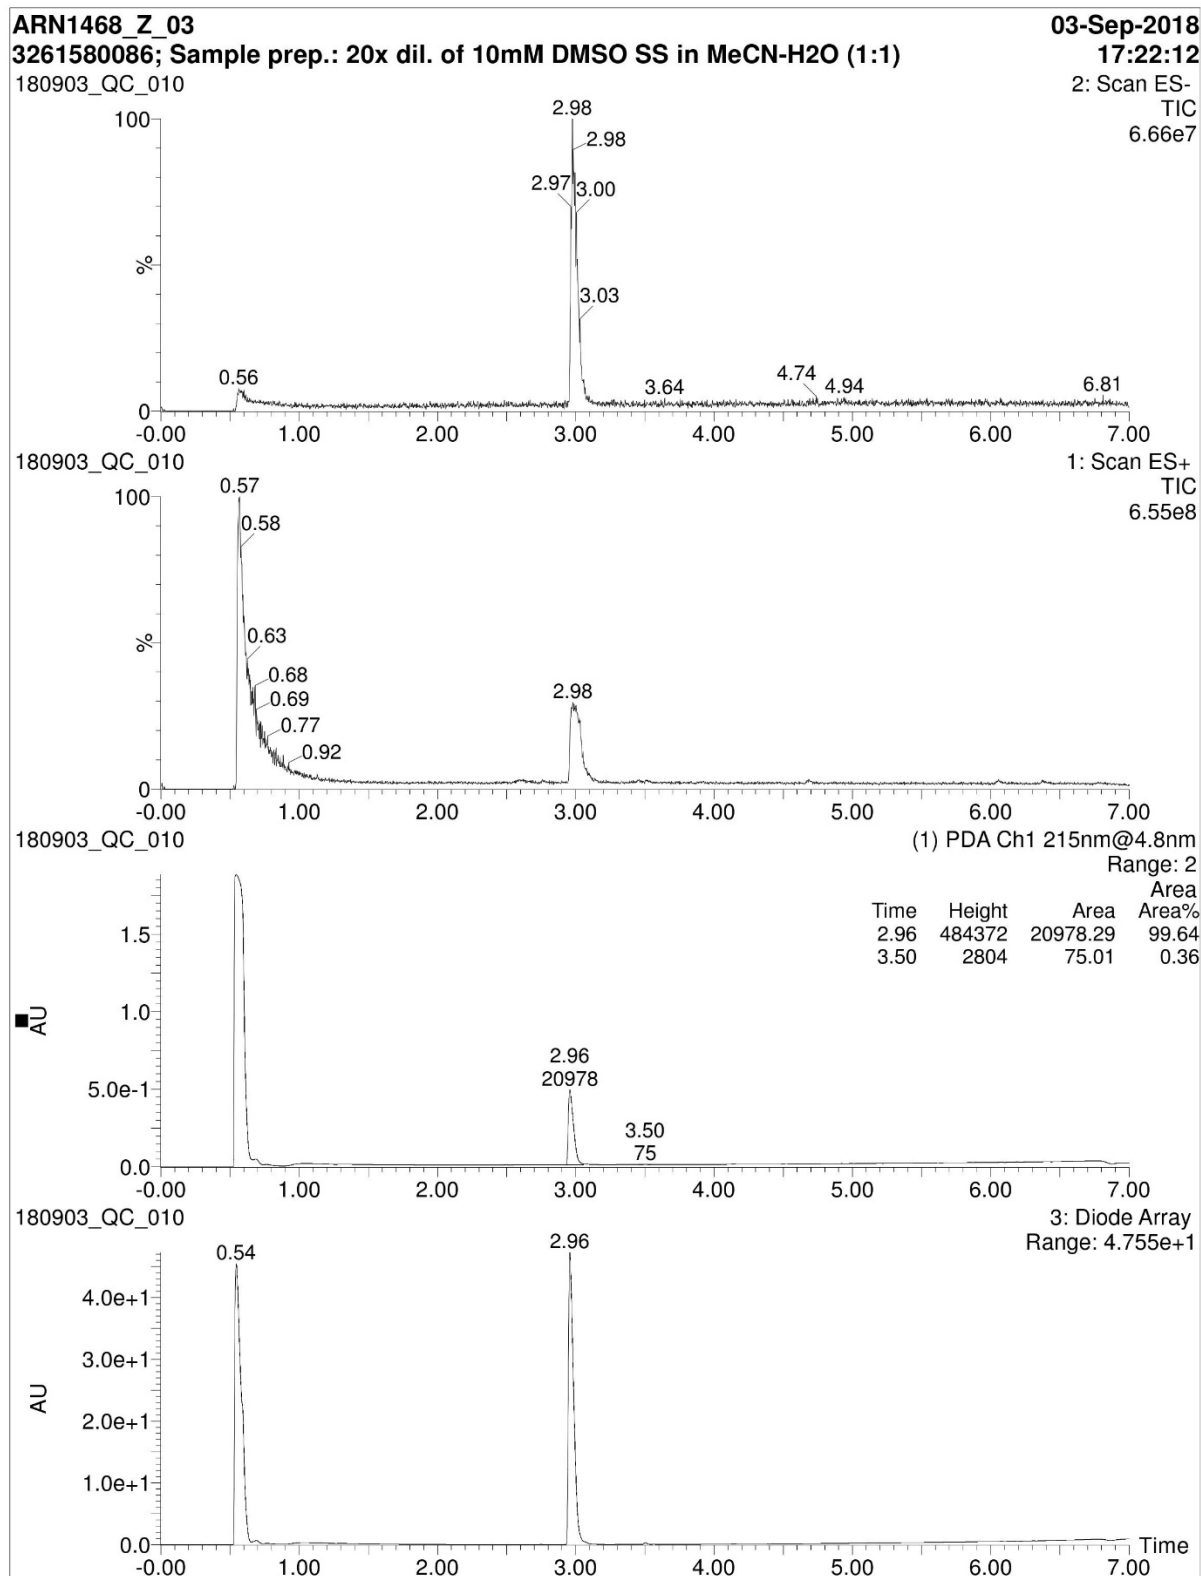

ARN1468\_Z\_03

3261580086; Sample prep.: 20x dil. of 10mM DMSO SS in MeCN-H2O (1:1)

180903\_QC\_010 1102 (2.976) Cm (1101:1114)

03-Sep-2018

17:22:12

2: Scan ES-  
3.69e7

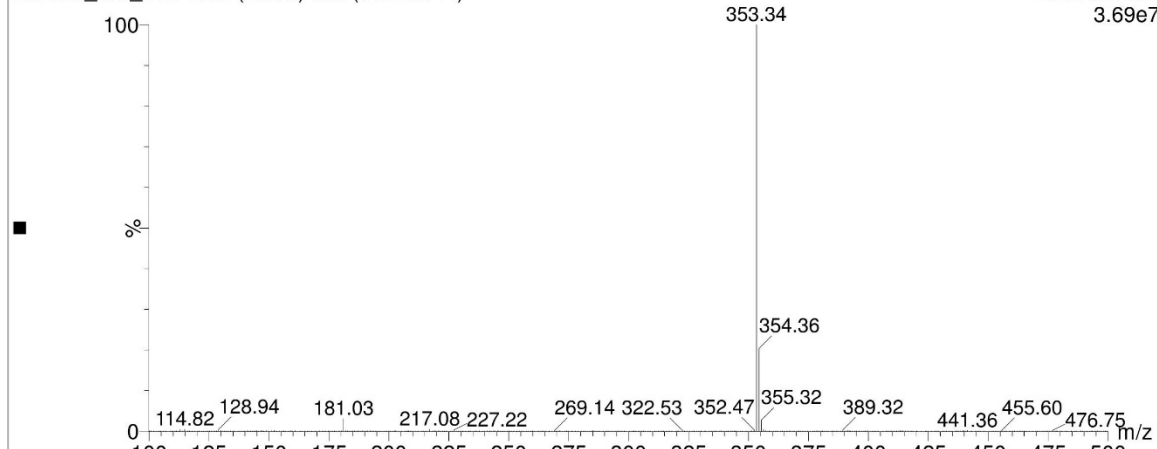

180903\_QC\_010 1107 (2.988) Cm (1107:1127)

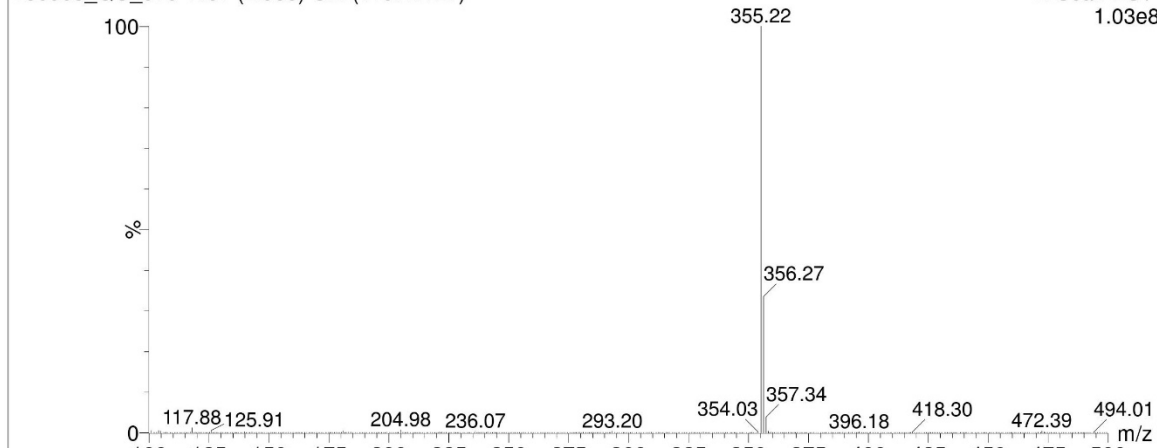

180903\_QC\_010 3550 (2.958)

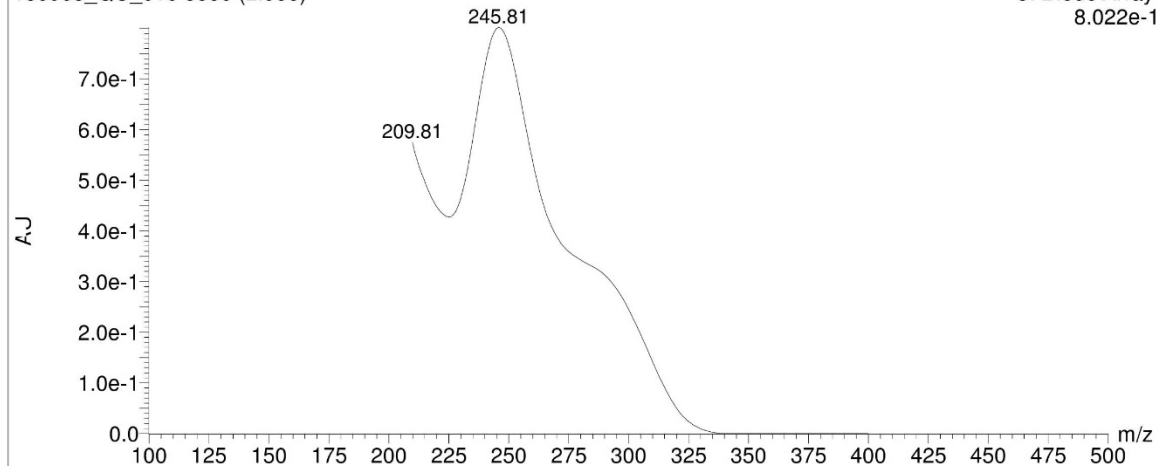

3: Diode Array  
8.022e-1
